# Supplementary material for: α-Fe2O3 Nanoparticles/Iron-Containing Vermiculite Composites: Structural, Textural, Optical and Photocatalytic Properties
Source: MDPI journal article supplement (doi:10.3390/min12050607), 2022-05-11
Supplement: s1 [file s1]

Archive with 1 entries (1 files):
- minerals-1691458-supplementary.pdf
